# Supplementary material
Source: HighWire-hosted journal article supplement (https://jmg.bmj.com/highwire/filestream/187825/field_highwire_adjunct_files/1/jmg-2022-108982supp002_data_supplement.pdf)
Supplement: jmg-2022-108982supp002_data_supplement.pdf [file jmg-2022-108982supp002_data_supplement.pdf]

## Females with WT (n=14)

## Males with WT (n=10)

| Patient #                           | 1             | 2             | 3             | 4               | 5               | 6                     | 7                     | 8                     | 9             | 10            | 11            | 12            | 13            | 14           | 15            | 16            | 17            | 18            | 19            | 20            | 21          | 22            | 23          | 24          |
|-------------------------------------|---------------|---------------|---------------|-----------------|-----------------|-----------------------|-----------------------|-----------------------|---------------|---------------|---------------|---------------|---------------|--------------|---------------|---------------|---------------|---------------|---------------|---------------|-------------|---------------|-------------|-------------|
| Age at diagnosis in months          | 36-72         | >72           | <36           | 36-72           | 36-72           | 36-72                 | >72                   | <36                   | 36-72         | 36-72         | 36-72         | 36-72         | <36           | <36          | <36           | <36           | <36           | >72           | <36           | 73            | >72         | <36           | 36-72       | 36-72       |
| WT stage                            | III           | IV            | I             | I               | V               | V                     | III                   | II                    | I             | I             | NB            | III           | VI            | II           | I             | I             | II            | I             | II            | III           | III         | III           | III         | II          |
| Causative genetic variant           | <b>REST</b>   | <b>FBXW7</b>  | <b>WT1</b>    | -               | -               | -                     | -                     | -                     | -             | -             | -             | -             | -             | -            | -             | -             | -             | -             | -             | -             | -           | -             | -           | -           |
| Causative epigenetic variant        | -             | -             | -             | <b>UPD11</b>    | -               | -                     | -                     | -                     | -             | -             | -             | -             | -             | -            | -             | -             | -             | -             | -             | -             | -           | -             | -           | -           |
| Macrosomia (>4,250g)                | 4000-<br>4249 | 3500-<br>3749 | 3000-<br>3249 | <b>&gt;4750</b> | <b>&gt;4750</b> | <b>4250-<br/>4499</b> | <b>4500-<br/>4750</b> | <b>4500-<br/>4750</b> | <3000         | 3750-<br>3999 | 3000-<br>3249 | 3000-<br>3249 | 3500-<br>3749 | -            | -             | 3500-<br>3749 | 4000-<br>4249 | -             | 4000-<br>4249 | 3750-<br>3999 | -           | 4000-<br>4249 | -           | <3000       |
| Placental weight                    | 750-<br>999   | 750-<br>999   | -             | 750-<br>999     | >1250           | 500-<br>749           | -                     | 750-<br>999           | <500          | 750-<br>999   | -             | 500-<br>749   | 500-<br>749   | 500-<br>749  | <500          | 500-<br>749   | 500-<br>749   | 1000-<br>1249 | 500-<br>749   | -             | 500-<br>749 | -             | 500-<br>749 | 500-<br>749 |
| Nephrogenic rest (pathology report) | intra         | -             | -             | -               | peri            | peri                  | -                     | peri                  | -             | peri          | intra         | -             | intra         | -            | -             | -             | -             | -             | intra         | peri          | -           | -             | -           | -           |
| Blood PyroSeq IC1 methylation       | -             | 44            | 41            | 55              | 44              | 43                    | 45                    | -                     | 42            | 43            | 42            | 45            | -             | -            | 43            | 43            | 43            | 42            | 46            | 43            | -           | -             | -           | -           |
| Blood MS-MLPA IC1 methylation       | -             | 59            | 51            | 63              | 53              | 47                    | 54                    | -                     | 54            | 57            | 61            | 50            | -             | -            | 61            | 56            | 57            | 48            | 65            | 58            | -           | -             | -           | -           |
| Tumor PyroSeq IC1 methylation       | -             | -             | -             | 83              | 83              | 69                    | 89                    | -                     | 76            | 90            | -             | -             | -             | -            | -             | 82            | 81            | 43            | 76            | -             | -           | -             | -           | -           |
| Tumor MS-MLPA IC1 methylation       | -             | -             | -             | 94              | 92              | 74                    | 99                    | -                     | 90            | 100           | -             | -             | -             | -            | -             | 96            | 89            | 58            | 92            | -             | -           | -             | -           | -           |
| pLoF in constrained gene (1st)      | <b>REST</b>   | <b>FBXW7</b>  | <b>WT1</b>    | <b>SLIT2</b>    | -               | -                     | -                     | -                     | -             | <b>KCNA4</b>  | -             | <b>FRMD4A</b> | -             | <b>OTUD4</b> | -             | -             | -             | -             | -             | <b>FRMD4A</b> | -           | -             | -           | -           |
| pLoF in constrained gene (2nd)      | <b>POLR2B</b> | <b>ZCCHC8</b> | -             | -               | -               | -                     | -                     | -                     | -             | -             | -             | <b>SMC2</b>   | -             | -            | -             | -             | -             | -             | -             | <b>CTNND1</b> | -           | -             | -           | -           |
| VUS (1st)                           | -             | -             | -             | -               | <b>NYNRIN</b>   | <b>DICER1</b>         | -                     | -                     | <b>NYNRIN</b> | -             | -             | <b>NBN</b>    | -             | -            | <b>NYNRIN</b> | -             | -             | -             | <b>CTNNB1</b> | -             | -           | <b>PALB2</b>  | -           | <b>REST</b> |
| VUS (2nd)                           | -             | -             | -             | -               | <b>CTR9</b>     | <b>NSD1</b>           | -                     | -                     | <b>BARD1</b>  | -             | -             | -             | -             | -            | <b>NYNRIN</b> | -             | -             | -             | -             | -             | -           | -             | -           | -           |
| VUS (3rd)                           | -             | -             | -             | -               | <b>ASXL1</b>    | -                     | -                     | -                     | -             | -             | -             | -             | -             | -            | -             | -             | -             | -             | -             | -             | -           | -             | -           | -           |
